# Supplementary material for: Development and evaluation of a novel xeno-free culture medium for human-induced pluripotent stem cells
Source: PubMed Central journal article supplement (PMC9166585; doi:10.1186/s13287-022-02879-z), 2022-06-03
Supplement: 13287_2022_2879_MOESM1_ESM.pdf [file 13287_2022_2879_MOESM1_ESM.pdf]

**Table S1 Media components of TeSR, E8 and ON2**

| Components                                                                                                                                                                                                                                                                                                                   | TeSR <sup>[1]</sup> | E8 <sup>[2]</sup> | ON2 | Storage                     |
|------------------------------------------------------------------------------------------------------------------------------------------------------------------------------------------------------------------------------------------------------------------------------------------------------------------------------|---------------------|-------------------|-----|-----------------------------|
| DMEM/F12                                                                                                                                                                                                                                                                                                                     |                     |                   |     | Basal medium<br>(At 4°C)    |
| NaHCO <sub>3</sub>                                                                                                                                                                                                                                                                                                           |                     |                   |     |                             |
| L-Ascorbic Acid                                                                                                                                                                                                                                                                                                              |                     |                   |     |                             |
| Selenium                                                                                                                                                                                                                                                                                                                     |                     |                   |     |                             |
| Insulin                                                                                                                                                                                                                                                                                                                      |                     |                   |     |                             |
| Transferrin                                                                                                                                                                                                                                                                                                                  |                     |                   |     |                             |
| FGF2                                                                                                                                                                                                                                                                                                                         |                     |                   |     | Supplement<br>(Below -20°C) |
| TGFβ1                                                                                                                                                                                                                                                                                                                        |                     |                   |     |                             |
| Albumin                                                                                                                                                                                                                                                                                                                      |                     |                   |     |                             |
| Pipelicolic acid                                                                                                                                                                                                                                                                                                             |                     |                   |     |                             |
| LiCl                                                                                                                                                                                                                                                                                                                         |                     |                   |     |                             |
| GABA                                                                                                                                                                                                                                                                                                                         |                     |                   |     |                             |
| Glutathione                                                                                                                                                                                                                                                                                                                  |                     |                   |     |                             |
| L-Glutamine                                                                                                                                                                                                                                                                                                                  |                     |                   |     |                             |
| Defined lipids                                                                                                                                                                                                                                                                                                               |                     |                   |     |                             |
| Thiamine                                                                                                                                                                                                                                                                                                                     |                     |                   |     |                             |
| Trace elements B                                                                                                                                                                                                                                                                                                             |                     |                   |     |                             |
| Trace elements C                                                                                                                                                                                                                                                                                                             |                     |                   |     |                             |
| β-mercaptoethanol                                                                                                                                                                                                                                                                                                            |                     |                   |     |                             |
| NODAL                                                                                                                                                                                                                                                                                                                        |                     |                   |     |                             |
| Activin A <sup>[3-5]</sup>                                                                                                                                                                                                                                                                                                   |                     |                   |     |                             |
| LIF <sup>[6-8]</sup>                                                                                                                                                                                                                                                                                                         |                     |                   |     |                             |
| Chondroitin sulfate <sup>[9]</sup>                                                                                                                                                                                                                                                                                           |                     |                   |     |                             |
| <p><b>Note 1:</b> In E8 media, NODAL and TGFβ1 are interchangeable in maintaining ES and iPS cells.</p> <p><b>Note 2:</b> It is recommended to all three media that before use, thaw and mix supplement to basal medium to make into complete medium, which should be stored at 4°C temporary and used within two weeks.</p> |                     |                   |     |                             |

[1] Ludwig, T.E., et al., Derivation of human embryonic stem cells in defined conditions. *Nat Biotechnol*, 513 2006. 24(2): p. 185-7

[2] Chen, G., et al., Chemically defined conditions for human iPSC derivation and culture. *Nat Methods*, 517 2011. 8(5): p. 424-9

[3] Vallier, L., et al., Activin/Nodal and FGF pathways cooperate to maintain pluripotency of human embryonic stem cells. *J Cell Sci*, 118 2005. (Pt 19):4495-509.

Pauklin, S. and L. Vallier, Activin/Nodal signalling in stem cells. *Development*, 2015. 142(4): p. 607-19.

[4] Osnato, A., et al., TGFbeta signalling is required to maintain pluripotency of human naive pluripotent stem cells. *Elife*, 2021. 10.

- [5] Vallier, L., M. Alexander, and R.A. Pedersen, Activin/Nodal and FGF pathways cooperate to maintain pluripotency of human embryonic stem cells. *Journal of Cell Science*, 2005. 118(19): p. 4495-4509.
- [6] Amit, M., et al., Feeder Layer- and Serum-Free Culture of Human Embryonic Stem Cells. *Biol Reprod*, 2004. 70(3): p. 837-45
- [7] Gafni, O., et al., Derivation of novel human ground state naive pluripotent stem cells. *Nature*, 2013. 504(7479): p. 282-286.
- [8] Ware Carol, B., et al., Derivation of naïve human embryonic stem cells. *Proceedings of the National Academy of Sciences*, 2014. 111(12): p. 4484-4489.
- [9] Ida, M., et al., Identification and functions of chondroitin sulfate in the milieu of neural stem cells. *J Biol Chem*, 2006. 281(9): p. 5982-91

**Table S2 Primers used in qRT-PCR analysis**

| Primer | Sequence                                                      |
|--------|---------------------------------------------------------------|
| GAPDH  | F: ACCACAGTCCATGCCATCAC<br>R: TCCACCACCCTGTTGCTGTA            |
| OCT3/4 | F: GACAGGGGGAGGGGAGGAGCTAGG<br>R: CTTCCCTCCAACCAGTTGCCCAAAC   |
| NANOG  | F: CAGCCCCGATTCTTCCACCAGTCCC<br>R: CGGAAGATTCCCAGTCGGGTTCCACC |
| SOX2   | F: GGGAAATGGGAGGGGTGCAAAAGAC<br>R: TTGCGTGAGTGTGGGATTGGTG     |
| KLF4   | F: CGCCTCCTGCTTGATCTTGGG<br>R: GACCCATCCTCCGGAGTCAGT          |
