# Supplementary material for: Development and evaluation of a novel xeno-free culture medium for human-induced pluripotent stem cells
Source: PubMed Central journal article supplement (PMC9166585; doi:10.1186/s13287-022-02879-z), 2022-06-03

# Figure S1

b

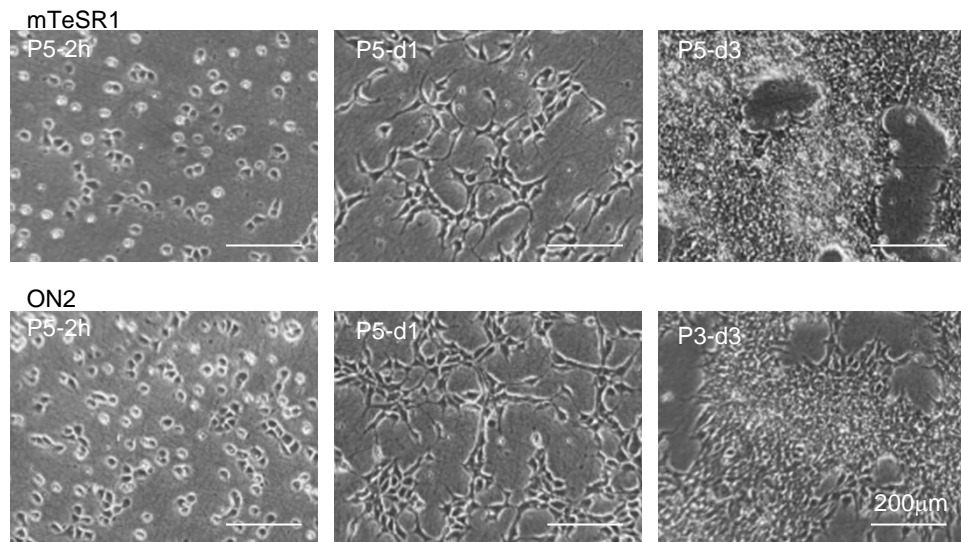

# Figure S2

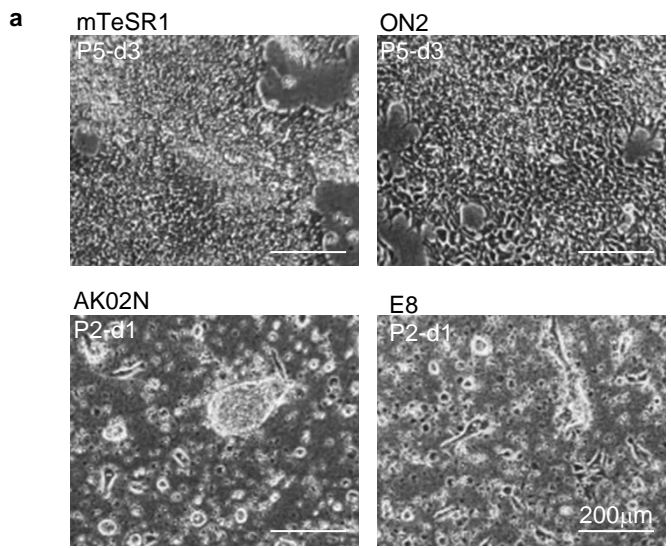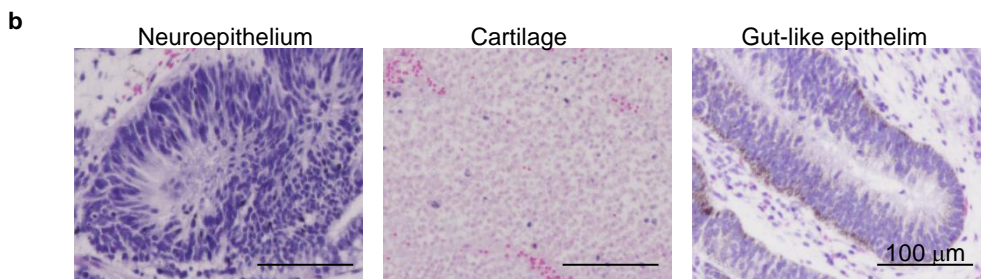

# Figure S3

**a**

FN 0.5  $\mu\text{g}/\text{cm}^2$

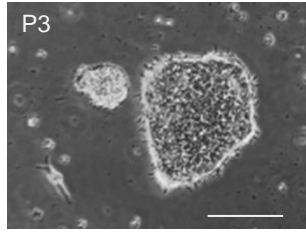

1.0  $\mu\text{g}/\text{cm}^2$

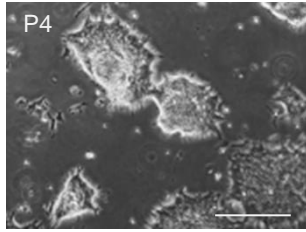

2.0  $\mu\text{g}/\text{cm}^2$

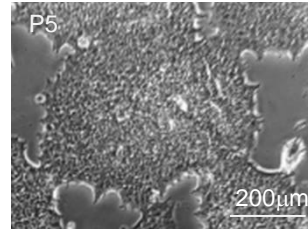

**b**

VN 0.5  $\mu\text{g}/\text{cm}^2$

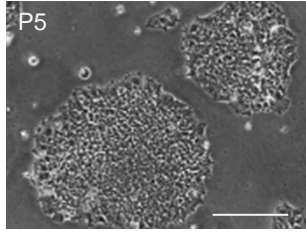

1.0  $\mu\text{g}/\text{cm}^2$

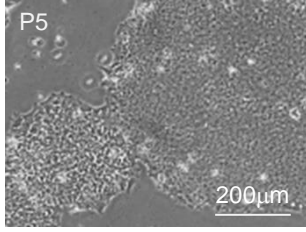

# Figure S4

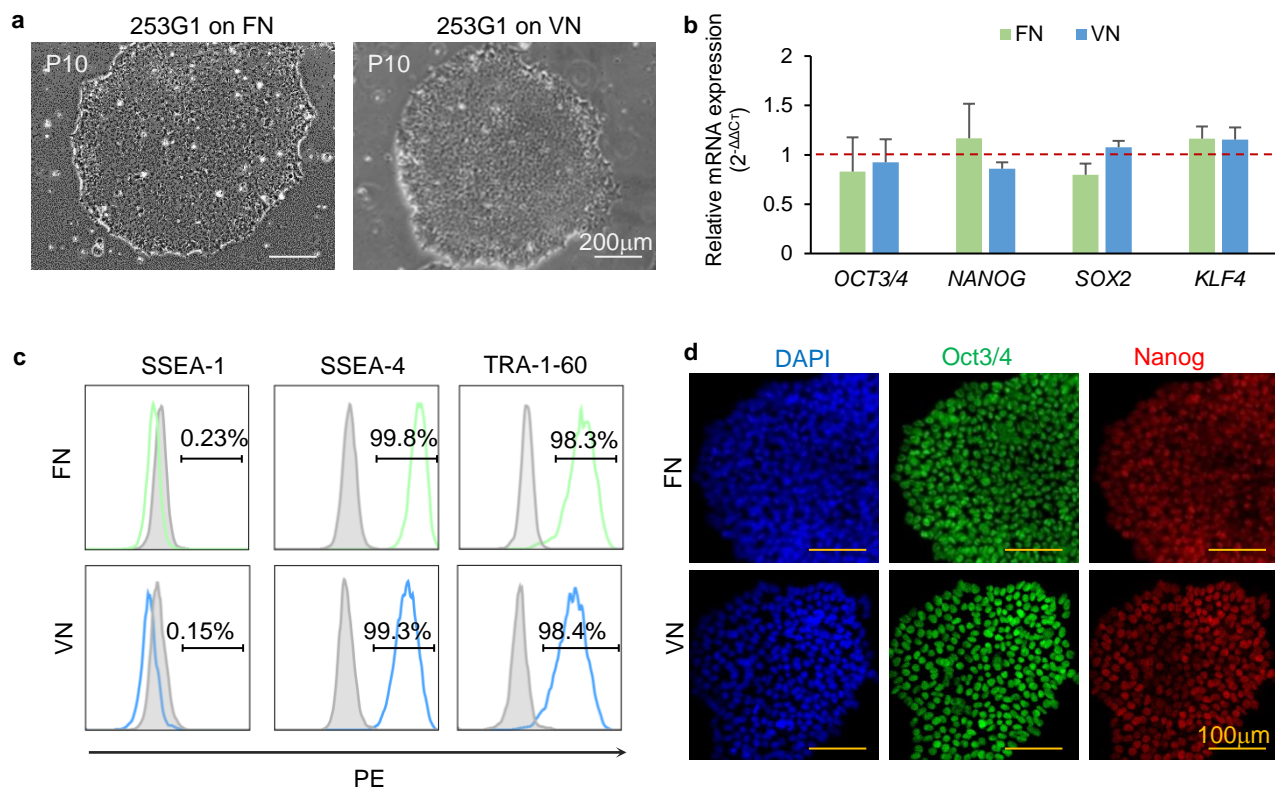

# Figure S5

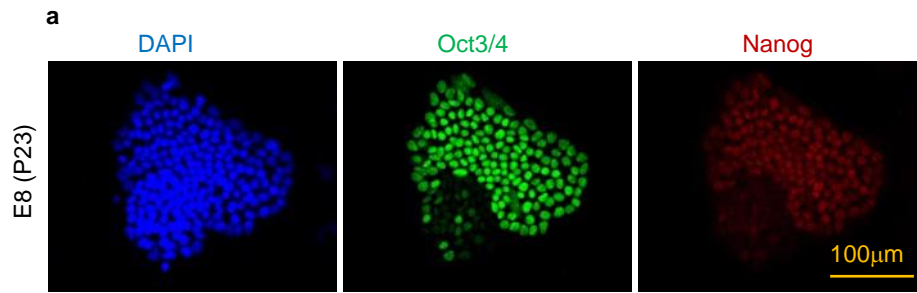

**b** Karyotype of 253G1 hiPSCs cultured on iMatrix-511 with E8 (P22)

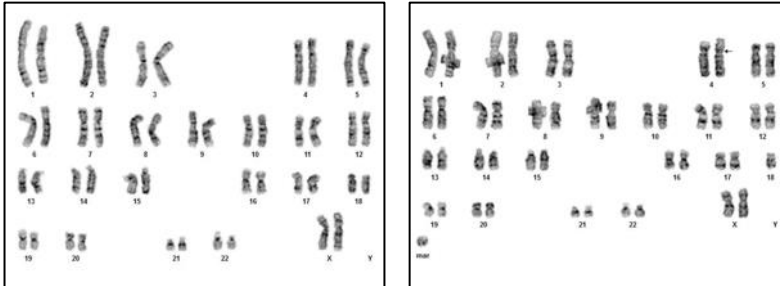

# Figure S6

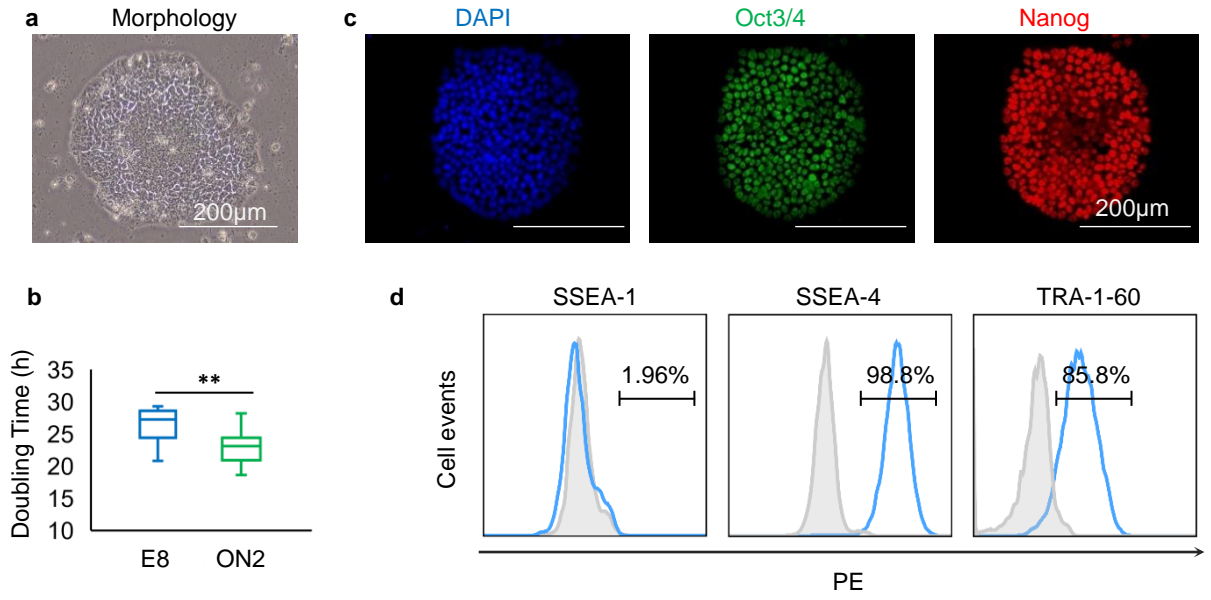

Supplement: 13287_2022_2879_MOESM2_ESM.pdf [file 13287_2022_2879_MOESM2_ESM.pdf]
